# Supplementary material
Source: PubMed Central journal article supplement (PMC10460619)
Supplement: NIHMS1794356-supplement-Appendix.pdf [file NIHMS1794356-supplement-Appendix.pdf]

## Appendix

### Relevant alcohol use and subjective response items from Daily Diary Assessments

#### Did you drink any alcohol yesterday?

No

Yes

You reported that you drank alcohol yesterday. Please confirm that this is correct.

I did drink yesterday

I did not drink yesterday

#### How did you feel **yesterday before drinking**?

|             | Not at all            | A little              | Moderately            | Quite a bit           | Extremely             |
|-------------|-----------------------|-----------------------|-----------------------|-----------------------|-----------------------|
| Downhearted | <input type="radio"/> |
| Discouraged | <input type="radio"/> |
| Uneasy      | <input type="radio"/> |
| Anxious     | <input type="radio"/> |

#### How did you feel **yesterday before drinking**?

|           | Not at all            | A little              | Moderately            | Quite a bit           | Extremely             |
|-----------|-----------------------|-----------------------|-----------------------|-----------------------|-----------------------|
| Joyful    | <input type="radio"/> |
| Cheerful  | <input type="radio"/> |
| Energetic | <input type="radio"/> |
| Lively    | <input type="radio"/> |

**Before drinking**, I craved a drink yesterday.

|                        |                       |                       |                       |                       |                       |                       |
|------------------------|-----------------------|-----------------------|-----------------------|-----------------------|-----------------------|-----------------------|
| Strongly Disagree<br>0 | 1                     | 2                     | 3                     | 4                     | 5                     | Strongly Agree<br>6   |
| <input type="radio"/>  | <input type="radio"/> | <input type="radio"/> | <input type="radio"/> | <input type="radio"/> | <input type="radio"/> | <input type="radio"/> |

**Before drinking**, all I wanted to do yesterday was have a drink.

|                        |                       |                       |                       |                       |                       |                       |
|------------------------|-----------------------|-----------------------|-----------------------|-----------------------|-----------------------|-----------------------|
| Strongly Disagree<br>0 | 1                     | 2                     | 3                     | 4                     | 5                     | Strongly Agree<br>6   |
| <input type="radio"/>  | <input type="radio"/> | <input type="radio"/> | <input type="radio"/> | <input type="radio"/> | <input type="radio"/> | <input type="radio"/> |

**Before you drank**, how strong was your urge to drink alcohol yesterday?

|                       |                       |                       |                       |                       |                       |                       |                       |                       |                       |                       |
|-----------------------|-----------------------|-----------------------|-----------------------|-----------------------|-----------------------|-----------------------|-----------------------|-----------------------|-----------------------|-----------------------|
| No urge<br>0          | 1                     | 2                     | 3                     | 4                     | 5                     | 6                     | 7                     | 8                     | 9                     | Strongest ever<br>10  |
| <input type="radio"/> |

How many **12-ounce beers** did you have yesterday?

How many **5-ounce glasses of wine** did you have yesterday?

How many **1.5-ounce shots of liquor** did you have yesterday - **alone or in a mixed drink**?

If you drank something not listed above, please indicate below the alcohol type (e.g. sake, soju, malt liquor, etc.) and number of drinks (e.g. two shots of sake, 24oz malt liquor, etc.):  
**Enter "none", if not applicable.**

How did you feel **yesterday while drinking?**

|             | Not at all            | A little              | Moderately            | Quite a bit           | Extremely             |
|-------------|-----------------------|-----------------------|-----------------------|-----------------------|-----------------------|
| Downhearted | <input type="radio"/> |
| Discouraged | <input type="radio"/> |
| Uneasy      | <input type="radio"/> |
| Anxious     | <input type="radio"/> |

How did you feel **yesterday while drinking?**

|           | Not at all            | A little              | Moderately            | Quite a bit           | Extremely             |
|-----------|-----------------------|-----------------------|-----------------------|-----------------------|-----------------------|
| Joyful    | <input type="radio"/> |
| Cheerful  | <input type="radio"/> |
| Energetic | <input type="radio"/> |
| Lively    | <input type="radio"/> |

**While drinking,** I craved a drink yesterday.

|                       |                       |                       |                       |                       |                       |                       |
|-----------------------|-----------------------|-----------------------|-----------------------|-----------------------|-----------------------|-----------------------|
| Strongly Disagree     | 1                     | 2                     | 3                     | 4                     | 5                     | Strongly Agree        |
| 0                     | <input type="radio"/> | 6                     |
| <input type="radio"/> |                       |                       |                       |                       |                       | <input type="radio"/> |

**While drinking,** all I wanted to do yesterday was have a drink.

|                       |                       |                       |                       |                       |                       |                       |
|-----------------------|-----------------------|-----------------------|-----------------------|-----------------------|-----------------------|-----------------------|
| Strongly Disagree     | 1                     | 2                     | 3                     | 4                     | 5                     | Strongly Agree        |
| 0                     | <input type="radio"/> | 6                     |
| <input type="radio"/> |                       |                       |                       |                       |                       | <input type="radio"/> |

**While drinking,** how strong was your urge to drink alcohol yesterday?

|                       |                       |                       |                       |                       |                       |                       |                       |                       |                       |                       |
|-----------------------|-----------------------|-----------------------|-----------------------|-----------------------|-----------------------|-----------------------|-----------------------|-----------------------|-----------------------|-----------------------|
| No urge               | 1                     | 2                     | 3                     | 4                     | 5                     | 6                     | 7                     | 8                     | 9                     | Strongest ever        |
| 0                     | <input type="radio"/> | 10                    |
| <input type="radio"/> |                       |                       |                       |                       |                       |                       |                       |                       |                       | <input type="radio"/> |
